# Supplementary material
Source: PubMed Central journal article supplement (PMC8640793)
Supplement: ajcr0011-5338-f8.pdf [file ajcr0011-5338-f8.pdf]

## Supplementary Material

### Quantitative real-time PCR

RNA was isolated from colon tissues or cells by TRIzol (Invitrogen) and reverse-transcribed into cDNA by PrimeScript RT Master Mix (#A360, TaKaRa). qPCR was performed by Quantitative RT-PCR (ABI-7300). The relative expression of target gene was calculated using the  $2^{-\Delta C_{(t)}}$  method. Fold change of target gene expression were calculated by normalization to control group. The primer sequences are shown in [Tables S2](#) and [S3](#).

### References

- [1] Chen J, Jayachandran M, Zhang W, Chen L, Du B, Yu Z and Xu B. Dietary supplementation with sea bass (*lateolabrax maculatus*) ameliorates ulcerative colitis and inflammation in macrophages through inhibiting toll-like receptor 4-linked pathways. *Int J Mol Sci* 2019; 20: 2907.
- [2] Sui H, Zhang L, Gu K, Chai N, Ji Q, Zhou L, Wang Y, Ren J, Yang L, Zhang B, Hu J and Li Q. YYFZBJS ameliorates colorectal cancer progression in *Apc<sup>Min/+</sup>* mice by remodeling gut microbiota and inhibiting regulatory T-cell generation. *Cell Commun Signal* 2020; 18: 113.

**Table S1.** DAI score in C57 mice (at the end of experiment)

| Group     | Symptom score |                   |              | Disease activity index (DAI) |
|-----------|---------------|-------------------|--------------|------------------------------|
|           | weight loss   | stool consistency | occult blood |                              |
| Control   | 2.625         | 2.75              | 2.25         | 2.54                         |
| YYFZBJS-L | 2.5           | 2.25              | 1.5          | 2.08                         |
| YYFZBJS-M | 2.75          | 2                 | 0.75         | 1.83                         |
| YYFZBJS-H | 3             | 1.25              | 0.5          | 1.58                         |
| Aspirin   | 2.875         | 1.25              | 0.5          | 1.54                         |

Symptom score including weight loss score, stool consistency score and occult blood score. The evaluation criterion of Symptom score was described as previous [1]. DAI = (weight loss score + stool consistency score + occult blood score)/3.

**Table S2.** PCR primers

| gene                               | Forward primer             | Reverse primer            |
|------------------------------------|----------------------------|---------------------------|
| <i>Clostridium butyricum</i>       | CCTCCTTCTATGGAGAAATCTAGCA  | TGTAGCTTGACCTTTTAAGTTTTGA |
| <i>Akkermansia</i>                 | CAGCACGTGAAGGTGGGGAC       | CCTTGC GGTTGGCTTCAG       |
| <i>Enterotoxigenic B. fragilis</i> | GGGACAAGGATTCTACCAGCTTTATA | ATTCGGCAATCTCATTATCATT    |
| <i>Lactobacillus rhamnosus</i>     | TGCATCTTGATTTAATTTTG       | CCCACTGC TGCTCCCGTAGGAGT  |

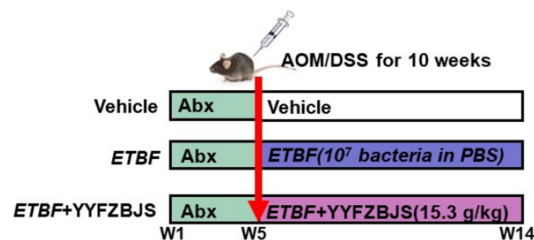

**Figure S1.** Experimental design indicating the timing of the intragastric administration and organization of groups. Mice were treated with Abx from W1 (age at week 4) to W4, then injected with AOM (12.5 mg/kg, i.p.) and provided drinking water for 1 week, and three cycles with DSS and drinking water for 3 weeks as described in the Methods section. During the treatment, Vehicle, ETBF and YYFZBJS were oral administration with  $10^8$  CFU/mice. The intragastric administration of YYFZBJS was taken at the doses of 15.3 g/kg with the high dose according to HED (human equivalent dose) as previous [2].

YYFZBJS suppress colorectal tumorigenesis via ETBF-induced TAMs

**Table S3.** PCR primers

| gene             | Forward primer            | Reverse primer            |
|------------------|---------------------------|---------------------------|
| CD30L            | AAGTTTGCTGGGTCCTCTC       | CCACTCCCAATCATGTGGCT      |
| CD54             | AGTCGTCGCTTCCGCTACC       | AGGGTGAGGTCCTTGCCTACTTG   |
| IL-1 $\alpha$    | CATTGGCGTTTGAGTCAGCA      | CATGGAGTGGGCCATAGCTT      |
| CXCL-1           | AACATGCCAGCCACTGTGAT      | GCCCCTTTGTCTAAGCCAG       |
| GM-CSF           | ACCCGCTCACCCATCACTGTG     | GGCATGTCATCCAGGAGGTTTCCAG |
| CCL12            | AGCTACCACCATCAGTCCCTCAGG  | ACACTGGCTGCTTGTGATTCTCC   |
| IL-13            | CTCTTGCTTGCCTTGGTGGTCTC   | TTGTGTGATGTTGCTCAGCTCCTC  |
| Leptin           | GGTTCCTGTGGCTTTGGTCTATC   | ACCCTCTGCTTGGCGGATACC     |
| TIMP-1           | AGGATTCAAGGCTGTGGGAAATGC  | CTTCACTGCGGTTCTGGGACTTG   |
| IL-10            | TGAAAACAAGAGCAAGGCCG      | GCCACCCTGATGTCTCAGTT      |
| IL-4             | TCTTTGCTGCCTCCAAGAACA     | GTTCTGTGCGAGCCGTTTCA      |
| IL-6             | CCACCGGAACGAAAGAGAA       | TCTTCTCTGGGGTACTGG        |
| IFN $\alpha$     | CCTGATGAATGCGGACTCCA      | TAGCAGGGGTGAGAGTCTTTG     |
| TNF $\alpha$     | CATCTTCTAAAATTCGAGTGACAA  | TGGGAGTAGACAAGGTACAACCC   |
| MMP1             | AGAAAGAAGACAAGGCAAGTTGA   | TTCCCAGTCACTTTCAGCCC      |
| MMP9             | TCTATGGTCTCGCCCTGAA       | CATCGTCCACCGGACTCAA       |
| Bax              | CATGGGCTGGACATTGGACT      | AAAGTAGGAGAGGAGGCCGT      |
| BCL-2            | CTTTGAGTTCGGTGGGGTCA      | GGGCCGTACAGTTCACAAA       |
| PTEN             | GGAAAGGGACGGACTGGTGTAAATG | CGCCTCTGACTGGGAATTGTGAC   |
| STAT3            | AATCTCAACTTCAGACCCGCCAAC  | GCTCCACGATCCTCTCCTCCAG    |
| Wnt3a            | TGCCGATGCCAGGGAGAACC      | CCAGCAGGTCTTCACTTCACAGC   |
| $\beta$ -catenin | TGCCGTTGCGCTTCATTATGGAC   | TGGGCAAAGGGCAAGGTTTCG     |
| GAPDH            | TGTGTCCGTCGTGGATCTGA      | CCTGCTTCACCACCTTCTTGA     |
